# Supplementary material for: Ground thermal and geomechanical conditions in a permafrost-affected high-latitude rockslide site (Polvartinden, Northern Norway)
Source: Copernicus journal article supplement (doi:10.5194/tc-2016-223), 2016-11-15
Supplement: Supplementary file [file tc-2016-223-RC1-supplement.pdf]

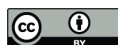

# Ground thermal and geomechanical conditions in a permafrost-affected high-latitude rockslide site (Polvartinden, Northern Norway)

Regula Frauenfelder<sup>1</sup>, Ketil Isaksen<sup>2</sup>, Jeannette Noetzli<sup>3</sup>, Matthew J. Lato<sup>4</sup>

<sup>1</sup>Norwegian Geotechnical Institute NGI, Oslo, 0806 Norway

5 <sup>2</sup>The Norwegian Meteorological Institute, Oslo, 0313, Norway

<sup>3</sup>Formerly University of Zurich, Zurich, 8057, Switzerland, now at: WSL-SLF, Davos, 7260, Switzerland

<sup>4</sup>Formerly NGI, now at: BGC Engineering Inc., Ottawa ON, Canada

Correspondence to: R. Frauenfelder (rf@ngi.no)

10 **Abstract.** In June 2008, a rockslide detached in the northeast facing slope of Polvartinden, a high-alpine mountain in  
 15 Signalaldalen, Northern Norway. Here, we report on the observed and modelled past and present near-surface temperature  
 regime close to the failure zone, as well as on a subsequent simulation of the subsurface temperature regime, and on initial  
 geomechanical mapping based on laser scanning. The volume of the rockslide was estimated to be approximately 500'000 m<sup>3</sup>.  
 The depth to the actual failure surface was found to range from 40 m at the back of the failure zone to 0 m at its toe. Visible  
 20 in-situ ice was observed in the failure zone just after the rockslide. Between September 2009 and August 2013 ground surface  
 temperatures were measured with miniature temperature data loggers at fourteen different localities close to the original failure  
 zone along the northern ridge of Polvartinden, and in the valley floor. The results from these measurements and from a basic  
 three-dimensional heat conduction model suggest that the lower altitudinal limit of permafrost at present is at 600-650 m a.s.l.,  
 which corresponds to the upper limit of the failure zone. A coupling of our in-situ data with regional climate data since 1958  
 25 suggests a general gradual warming and that a period with highest mean near surface temperatures on record ended four months  
 before the Signalaldalen rockslide detached. A comparison with a transient permafrost model run at 10 m depth, representative  
 for areas where snow accumulates, strengthen this findings, which are also in congruence with measurements in nearby  
 permafrost boreholes. It is likely that permafrost in and near the failure zone is presently subject to degradation. This  
 degradation, in combination with the extreme warm year antecedent to the rock failure, is seen to have played an important  
 role in the detaching of the Signalaldalen rockslide.

## 1 Introduction

30 In the morning of June 26<sup>th</sup>, 2008 a rockslide detached from the northeast facing slope of Polvartinden, a 1275 m high mountain  
 in Signalaldalen, Troms county, Northern Norway (located at 69°10'18"N/19°57'47"E; Fig. 1). The rockslide endangered two  
 farms and several recreation cabins, and it permanently destroyed a considerable amount of livestock pastures. Just after the  
 slide event, experts from the Norwegian Geotechnical Institute were summoned to the slide location by request of the

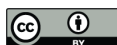

~~municipality and first reconnaissance work was carried out, including failure zone assessment by means of visual inspection from a helicopter.~~ During this visual inspection, a few hours after the event, in-situ ice was observed in the failure zone at several meters depth (Fig. 2). This observation, together with the absence of any typical pre-weather conditions (such as intensive rainfall or snow melt) that could have triggered the slide, led to the hypothesis that warming or degrading of permafrost could have played a role in the timing and the magnitude of the event. ~~Yet, the financial means of the municipality did not allow for a temperature monitoring at that time.~~ First a year after the event, a temporary temperature monitoring network could be put in place within the framework of an R&D cooperation between the Norwegian Geotechnical Institute and the Norwegian Meteorological Institute. Within this framework repeated surveying of the failure zone and the adjacent slopes by means of terrestrial laser scanning was carried out between 2009 and 2013.

10

Scientists have become increasingly aware that atmospheric warming has a potential impact on mountain permafrost (e.g., Haeberli, et al., 2010; Harris et al. 2009; Jin et al., 2000; Marchenko et al., 2007). It seems that mountain systems are especially sensitive to a changing climate due to feedback effects in connection with snow cover, albedo and heat budgets which amplify the alterations caused by climate change (Gobiet et al., 2014; Vavrus 2007; Wang et al., 2014). Several studies from the European Alps show that temperatures have increased twice as much as the global average since around 1900. There also exists increasing evidence ~~—many from studies from the European Alps—~~ that there exists a link between rock fall magnitude and frequency, and timing and depth of permafrost degradation, the latter ranging from seasonal increase of active-layer depths to long-term, deep-seated warming of the permafrost body as a response to atmospheric temperature rise (e.g., Gruber and Haeberli, 2007). Fischer et al. (2012) collected published material on large rockslide and rock avalanche events (volumes between  $10^5$  and  $10^7$  m<sup>3</sup>), as well as on more frequent small-volume rockfall events. Their study concludes that such events occur worldwide in periglacial environments, and that many of the reviewed studies suggest that the reported events may be related to ongoing and/or past changes in permafrost and glacierization. Corresponding events have, for example, been documented for the European Alps (e.g., Barla et al., 2000; Crosta et al., 2004; Gruber et al., 2004; Cola, 2005; Deline et al. 2011; Oppikofer et al., 2008; Raveland and Deline, 2010; Phillips et al., 2016), Canada and Alaska (e.g. Evans and Clague, 1994; Geertsema et al., 2006), the Caucasus (e.g. Haeberli et al., 2004) and for New Zealand (e.g. Allen et al., 2011).

25

In mainland Norway (i.e., excluding Svalbard), permafrost occurs mainly in the central mountain chains and in higher latitude areas, such as the counties of Troms and Finnmark (Gisnås et al., 2016). Early studies by, e.g., King (1986), Ødegård et al. (1996), and Etzelmüller et al. (2003) have shown that permafrost is discontinuous in the higher mountains of central southern and eastern Norway. More recent studies (e.g., Farbrøt et al., 2011) yield that permafrost temperatures in general are between -3 and 0 °C in the higher mountains of southern Norway and warming and degrading permafrost have been documented to occur at sites with cold permafrost, marginal permafrost and deep seasonal frost (Isaksen et al., 2011). It has, therefore, to be expected that the permafrost is particularly vulnerable to climate change (Christiansen et al., 2010; Farbrøt et al., 2011). Large-scale rock-slope failures pose a significant geohazard in the fjords and valleys of western and northern Norway (Blikra et al.,

30

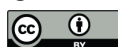

2006). A study by Blikra and Christiansen (2014) on the interactions between permafrost and rockslide deformation at the Nordnesfjellet site in northern Norway (location indicated in Fig. 1) shows that systematic seasonal changes – thought to be controlled by sporadic permafrost occurrence – considerably affect the shear strength of the sliding planes (Blikra et al., 2015).

5 Only few studies are available on the distribution of mountain permafrost and its thermal state in high-relief areas in northern Norway. Due to increased awareness of the potential role of permafrost degradation to landslide risk, a permafrost and climate monitoring programme was initiated in 2002 along climate and altitudinal transects in Troms and Finnmark, the two northernmost counties of mainland Norway (Isaksen et al., 2004; Isaksen et al., 2008). In 2003 a permafrost programme was also launched in the Gaissane Mountains in northernmost county Finnmark (Farbrot et al., 2008). In the mountains of Troms  
 10 two 30–32 m deep boreholes were drilled in 2004 at altitudes of 786–850 m a.s.l. (Isaksen et al., 2011b). These studies found permafrost to be warm, but widespread in alpine areas in northern Norway. Some of the most hazardous rockslide areas in Norway are found in the fjord districts of Troms, where several unstable rock slopes exist (Blikra et al., 2006). The existing monitoring network in northern Norway was more extensively instrumented and extended with new boreholes in Troms and Finnmark during the third International Polar Year 2007–2009 (cf. Christiansen et al., 2010). Data from these boreholes are  
 15 freely available in the Norwegian Permafrost Database (NORPERM) developed during the IPY period (Juliussen et al., 2010) and were extensively analysed by Farbrot et al. (2013). They found that the combined effects of snow depth and vegetation cover are the two most critical factors for the existence of permafrost in northern Norway. Farbrot et al. (2013) also concluded that the depth of seasonal frost or active layer in areas underlain by exposed bedrock was more than 10 m at several sites and was amongst the deepest reported in the international literature. Since the end of the Little Ice Age (LIA), the altitude of the  
 20 lower limit of permafrost has probably increased around 200–300 m (Farbrot et al., 2013). This was supported in a recent study by Myhra et al. (2015) who modelled permafrost distribution and long-term thermal changes in, among others, a steep rock wall at Revdalsfjellet which is situated close to the unstable and extensively monitored Nordnesfjellet (Blikra and Christiansen, 2014) and 25 km from our Signaldalen site. For the same mountain Myhra et al. (2015) modelled bedrock warming at 20 and 50 m depth of about 1.0 and 0.5 °C, respectively, from the end of the LIA and with a present lower limit of permafrost of about  
 25 650 m a.s.l. From the development of a new Nordic permafrost map there exist new modelling results, which confirm ongoing degradation of mountain permafrost in the fjord areas in Troms (Gisnås et al., 2016).

In this paper, we present analyses of a four-year temperature data series from near-surface temperature loggers, subsequent temperature regime modelling, and geomechanical mapping in Signaldalen, northern Norway, at a high-latitude, high-relief  
 30 rockslide site. The main objective of our study is to increase our understanding of the permafrost temperature regime at the site and what role the ground temperatures might have played in the release of the slide. Further, we aim to contribute to the understanding of the influence of solar radiation on near surface temperatures in different aspects of steep mountain walls at high-latitudes.

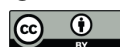

## 2 Methods

In order to map the thickness and the geometrical characteristics of the failure zone, the release area was repeatedly surveyed by terrestrial laser scanning. This allowed also for monitoring of eventual continued or fresh movement in the slope. In-situ measurements of ground surface temperatures and subsequent temperature modelling was employed to get insight into the past- and present temperature regime at and near Polvartinden peak.

The larger area around the failure zone, outside the steepest slope, is characterized by a combination of small vertical rock outcrops and undulating slopes with an established soil cover. Snow cover and snow depth therefore varies considerably in these two different types of topographies. Consequently, temperature loggers were installed in both types of terrain, i.e. in both vertical rock outcrops and within soil material of the more gentle slopes. The locations of the temperature logger placements were also selected in order to cover different aspects.

To obtain a robust estimate of how past and present ground temperatures had evolved prior to the failure, i.e. in the long- and in the short-term, two different approaches were used: Firstly, the ground surface temperatures in selected rock outcrops were linked to long-term changes in regional air temperature by comparing their statistical relation with temperature data from the official weather stations Skibotn and Ripojavri. We found that the linkage between those two datasets was strongest for rock outcrops with little or no snow, i.e. with a fairly direct link to the atmospheric conditions. Therefore, and secondly, it was desirable to look further into the temperature development in the ground in areas close to the release area with a more established snow and soil cover. To this aim, the CryoGrid2 model (cf. Westermann et al., 2013) was used. Since Polvartinden is an alpine peak, with three-dimensional effects that affect the ground temperature field inside the mountain, the lower permafrost limit will vary according to different aspects. In order to better understand the present subsurface temperature field of Polvartinden and to get a better idea of how the lower permafrost limit is located with respect to the release area of the slide, a stationary three-dimensional transient heat conduction model (cf. Noetzli et al., 2007a, b) was used. It was natural to install loggers in different compass directions to study the differences in surface temperature as a result of aspect dependency. As input data for the analyses of aspect dependency robust estimates of air temperature were needed for each of the installed rock wall localities. This in order to calculate the temperature difference ( $\Delta T$ ) between calculated air temperature and measured rock face temperatures (surface offset).

### 2.1 Geomechanical mapping

In the autumns of 2010, 2011 and 2013, the slide failure zone was imaged with an HD Optech IIRIS terrestrial laser scanner (Optech Incorporated, Canada). In addition, the failure zone and its surroundings were imaged with a Giga-Pan camera in autumn 2013. The purpose of the laser scanning data collection was to develop a digital terrain model in order to enable the



quantification of the extent and volume of the failure zone and the slide area. The data needed to be of significant resolution to enable temporal modelling of the area and identify zones within the slide area that show differential movement.

The failure zone is located approximately 600 m above the valley bottom, on the western side (facing east). The altitude of the failure zone in combination with the slope of the mountain side resulted in the failure zone being located approximately 800–1100 m away from the nearest possible scanning locations. To produce a 3D terrain model with a minimal amount of occlusion data was collected from three independent locations (identified in Figure 3). Each location was selected because it provided an excellent line-of-sight to the failure zone. Data was collected at varying resolutions. Low resolution data was collected to enable the visualization and modelling of a large area of the mountainside. Higher resolution data was collected at specific zones near the failure zone and its surrounding areas to enable a geomechanical interpretation.

Generally, Optech Ilris data would be parsed into pf formats and imported directly into the software used, i.e. into PolyWorks. However, in this instance that method failed. For an unknown reason the normal information collected by the scanner, processed by the Parsing software and interpolated by PolyWorks failed. This meant that the data had to be parsed as an XYZI file and manually interpolated by Polyworks. Once the polygonal model was created, the resultant model was viewed, cleaned, and edited where necessary. During this process the most fundamental change to the model was the filling of data holes using regularized spline interpolation. The data holes were filled primarily for visualization purposes. The extremely irregular surface as well as large amounts of snow and ice present resulted in the development of a mesh with numerous larger data holes. All major data holes were filled except for one large area that was covered with ice during the time of the first scanning. The area is approximately 100 m wide and could not be filled with any accuracy.

Calculating the volume of the failed mass could only be done based on interpolation and estimation. Since there does not exist a sufficiently high resolution 3D image of the area before the failure, an interpolated surface had to be used to estimate the volume. The volume estimation was completed using both PolyWorks and ArcGIS software packages.

## 2.2 Ground surface and air-temperature measurements

Ground surface temperatures were measured at fourteen locations employing miniature temperature data loggers of three different types: M-Log5W loggers (GeoPrecision GmbH, Germany), redesigned UTL-1 loggers (University of Bern and University of Zurich, Switzerland, cf. Gruber et al., 2003) and UTL-3 loggers (GEOTEST and WSL Institute for Snow and Avalanche Research SLF, Switzerland). We followed the installation setup described by Gruber et al. (2003), hence measuring near-surface rock temperatures at 10 cm depth (Fig. 3a). Installation sites were chosen based on the availability of near-vertical rock outcrops, their closeness to the original failure zone and, last but not least, the accessibility of the identified locations. Where possible, a vertical distance of several meters to the flat terrain was chosen, however, this was not possible at all of the

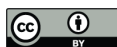

sites, which has some implications on the interpretation of the results. The fourteen measurement sites finally chosen are plotted on the map shown in Fig. 3b; they are located along the NNW-ridge of Polvartinden and in the valley ground.

Measurements were ongoing from September 2009 to August 2013 for 10 out of 14 loggers. For R09 and R10 only data for 2009–2011 exists, while R12 and R13 were first installed in 2011, thus yielding data for 2011 to 2013. Nine temperature loggers (type M-Log5W and redesigned UTL-1; identified as R# loggers in text and figures) were installed in vertical rock faces on rock outcrops and along small cliffs with different aspects, while five loggers (standard UTL-1/UTL-3; identified as S# loggers in text and figures) were placed directly into the soil at ca. 10 cm depth, in order to measure ground surface temperatures. One additional logger was placed in a cairn in the valley floor to monitor air temperature.

Regional air temperature data were obtained from the two meteorological stations Skibotn (5 m a.s.l.) and Rihpojavri (502 m a.s.l.) (for locations see Fig. 1), being the most representative weather stations for our study area. ~~Originally, two more loggers were installed on the Polvartinden ridge, one to measure air temperature, one for soil temperature monitoring. Unfortunately, these two loggers located spatially close to each other were subject to theft already during the first measurement year.~~

## 2.3 Ground surface temperature modelling

### 2.3.1. Long-term changes in ground temperatures

To study long-term changes in ground temperatures representative for the same elevation as the failure zone, but for sites with a developed soil cover and where snow accumulates, we used data series from the transient permafrost model CryoGrid2 (CG2; cf. Westermann et al., 2013). The physical basis and operational details of CG2 are documented in Westermann et al. (2013), and only a brief overview over the model properties is given here. CG2 calculates ground temperatures according to Fourier's law of conductive heat transfer in the soil and in the snowpack to determine the evolution of ground temperature over time.

The model is forced by operational gridded (1 x 1 km) air temperature (Mohr, 2009; Tveito et al., 2000) and snow-depth (Engeset et al., 2004; Saloranta, 2012). A grid cell covering Polvartinden and similar in elevation (665 m a.s.l.) as the failure zone was selected. The model parameters for the lower boundary condition and for ground properties were chosen as in Westermann et al. (2013). The surface geology was based on the major surface sediment classification by the Norwegian Geological Survey (NGU, 2010; Thoresen, 1990). For our study site and the selected grid cell, the sediment stratigraphy was classified as till and coarse colluvium (class 11 according to the sediment map by NGU, 2010) and followed default settings in CG2 with volumetric fractions of the soil constituents and soil type for each layer as given in Westermann et al. (2013). An interval of snow thermal conductivity ( $k_{\text{snow}}$ ) was regarded as parameter uncertainty by Westermann et al. (2013), and was used as a confining range for the true conditions as a *low* (LC,  $k_{\text{snow}} = 0.3 \text{ W m}^{-1} \text{ K}^{-1}$ ) and a *high* (HC,  $k_{\text{snow}} = 0.5 \text{ W m}^{-1} \text{ K}^{-1}$ ) conductivity scenario run of CG2. To study long-term changes in ground temperatures and to avoid dominance of near-surface



high-frequency temperature variations we selected 10 m depth as an appropriate depth. For more details on the CG2 model, please refer to Westermann et al. (2013).

### 2.3.2. Present subsurface temperature field

To get insights into the present subsurface temperature field of Polvartinden we employed a stationary three-dimensional transient heat conduction model. The applied model is discussed in detail in Noetzli et al. (2007a, b) and Noetzli and Gruber (2009). Where possible, this stationary three-dimensional transient heat conduction model was fed with local datasets. The geometry of the model was based on a 10 m digital terrain model for the surface topography and a 1000 m rectangular box for the subsurface mass. Values defining the subsurface properties (heat capacity, thermal conductivity, porosity) were obtained from representative sites nearby (cf. Lilleøren et al., 2012) and assumed to be uniform (cf. Table 1). The geothermal heat flux as the lower boundary condition was set to  $60 \text{ mW m}^{-2}$  (Slagstad et al., 2009). The upper boundary condition was set as a fixed temperature with annual mean values from the distributed rock face temperature measurements (MAGST). The dependency was based on the fit curve from the first two years of data (2009/10–2010/11, cf. Fig. 11a). MAGST changes were assumed to have roughly followed changes in mean annual air temperature (MAAT). The regional LIA glacier maximum is suggested to have occurred about 1900–1910 (e.g., Ballantyne, 1990; Bakke and others, 2005). Therefore, the simulation was started with a steady state in 1900 and assuming a linear MAAT increase from 1900 to the start of our measurements of  $0.55 \text{ }^{\circ}\text{C}$  (Lilleøren et al., 2012). Our results are valid for areas that are assumed not to be influenced by a snow cover, i.e., the steep rock-faces of Polvartinden. The main source of uncertainty for the three-dimensional modelling is related to the extrapolation of the MAGST.

### 2.3.3. Lapse rates

To study the surface offset and local influences on air temperature lapse rates for our ground surface temperature locations, we studied the inter-annual variability from 2009–2013 in monthly mean lapse rates. In the absence of local air temperature measurements at higher elevation (similar to the rock wall loggers), the monthly lapse rates were calculated based on the nearest mountain weather station located at Rihpojavri (502 m a.s.l., Fig. 1) and our local air temperature measurement site in Snaldalen valley (65 m a.s.l.).

## 3 Results

### 3.1 Geomechanical characteristics

Based on the laser scanning results, the volume of the rockslide was estimated to be approximately  $500'000 \text{ m}^3$ . These results confirm earlier estimates suggested during the emergency response work initiated directly after the event NGI (2008).





The depth to the actual failure surface was found to range from 40 m at the back of the failure zone to 0 m at its toe, with the failure zone being a complex wedge with increasing depth of the plane of failure from the front to the back (Fig. 4). Understanding the principle mechanism behind the failure involves a kinematic evaluation of the failure scarp. Figure 5 illustrates an equal area stereonet. Plotted on the stereonet are the poles to the bedding surface. The bedding planes have been identified as the failure surface from the terrestrial laser scanning data and from interpretation of the GigaPan photography. The extraction of the orientation of the bedding surface and the orientation of the natural slope (“Pre Failure Surface”) are determined directly through measurements using the laser scanning data. The green line in Figure 5 represents the orientation of the natural slope surface, and the green circle represents the corresponding daylight window. The white cone depicts an estimated friction surface of 30°. Poles that are contained outside of the white circle but within the green circle are kinematically unstable and represent potential sliding failure planes. This stereonet demonstrates that the bedding surface orientation is steeper than the estimated friction angle but shallow enough to daylight with respect to the slope face. The bedding surface meets, therewith, the kinematic requirements of a sliding failure posing a potential rockfall hazard (see e.g., Hasler et al., 2012).

The surficial change of the exposed rock mass between 2011 and 2013 is mapped through the comparison of laser scanning data collected at different points in time. The maximum size of blocks released between 2011 and 2013 range from 1 m<sup>3</sup> to 10 m<sup>3</sup>. In summary, the repeated laser scanning measurements between 2009, 2011 and 2013 showed little to no rock fall activity, both within the 2008 failure zone, in the adjacent rock slopes.

### 3.2 Measured mean annual ground temperatures

Measured Ground Surface Temperature (GST) data series for the four-year measurements period were smoothed with a 365-day running mean filter (Fig. 6). There is a slightly higher variability for air temperature (AirT) than GST (at ca 10 cm depth), but the overall correlation is high. Rock and soil temperatures measured during 2009–2013 show mean annual ground surface temperatures (MAGST) between -1.4 °C (coldest) and +2.2 °C (warmest), with the highest temperatures recorded in the measurement year April 2011 to March 2012 (Logger R05-E). For the vertical rock face sites, the lowest MAGST was recorded at the north-facing site in a 365-days period between September 2009 and September 2010 (Logger R06-N).

The large inter-annual variability found in our temperature measurement series is in congruence with general climate conditions in Troms and is confirmed by measurements in nearby mountain slopes (Isaksen et al., 2011a). For the monitoring periods 2009–2013, average, minimum and maximum mean annual air temperatures (MAAT) at the nearby Skibotn meteorological station (27 km to the NNE from Signaldalen) were 0.0 °C, 1.2°C below and 1.5°C above the MAAT for the normal period of 1981–2010, respectively.





During 2010/2011 some of the sites were clearly influenced by a snow cover. Based on an analysis of wind direction, wind speed and total snow accumulation at nearby weather stations (among others Skibotn), we assume this difference in snow cover to be caused by inter-annual differences in prevailing wind direction and preferential snow deposition.

5 We found a very high correlation between our air temperature measurements in the valley bottom (2009–2013) and air temperature data covering the same period from the nearest two meteorological stations at Skibotn ( $R^2 = 0.99$ ; Fig. 7a) and Rihpojavri ( $R^2 = 0.97$ ; Fig. 7b). Furthermore, we found a very high correlation between our local air temperature measurements in the Signaldalen valley floor and the rock wall loggers R05 ( $R^2 = 0.99$ ; Fig. 7c) and R06 ( $R^2 = 0.98$ ; Fig. 7d). The temperature series from loggers R05 and R06 were chosen because they seem least influenced by snow and they are also the "warmest" and "coldest" loggers, respectively, in the four-year measurement period. Temperatures at logger site R05 are about 1.3 °C higher than at the north-facing series at logger site R06. This good correlation allowed us for using the meteorological data from Skibotn for modelling of the long-term evolution of GST at R05 and R06 for evaluating the potential permafrost distribution near the original failure zone on Polvartinden and recent ground temperature changes by coupling our in-situ surface temperature data with regional and large-scale climate data.

15

### 3.3 Modelled mean annual ground temperatures

In order to be able to link our short temperature rock wall series to the greater regional climate development, we compare it to synthetic series based on the regressions presented in Figure 7 and the transient permafrost model CG2 that calculates ground temperatures according to conductive heat transfer in the soil and in the snowpack (Westermann et al. 2013). The CG2 model results are representative for flatter areas at ca. 665 m a.s.l. (which is roughly the altitude of the failure zone), where snow accumulates.

The coupling of our coldest in-situ GST data from R06 with the climate data from Skibotn since 1958 (cf. Fig. 7d) suggests that the highest MAGST on record was 1.1 °C and occurred in the 12-month period between March 2007 and February 2008, i.e., ending four months before the Signaldalen rockslide detached (Fig. 8a). A comparison with the CG2 model data run at 10 m depth for the same period suggests a gradual warming and degradation of the permafrost and supports our synthetic series with the warmest period occurring just a few months prior to the failure. Figure 8b shows the recent 10-year period for the synthetic series and the four-year series of the in-situ GST data for the coldest (R06) and the warmest (R05) rock wall temperatures, covering the range of the measured rock wall temperatures. The figure also shows the two CG2 model runs. According to Westermann et al. (2013) the thermal conductivity of the snow is the largest source of uncertainty in CG2, thus a low (LC) and a high conductivity (HC) scenario run of CG2 are used for the last 10 years as a confining range for the true conditions. Note that the synthetic series are slightly warmer than the GST series for R06 during the first two years. The

30

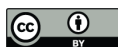

deviation is likely to be due to a thin snow cover that partly covered the rock-face/outcrop particularly the second winter of the monitoring campaign.

Since 1958, the CG2 results clearly indicate warming. Coincidentally, the period Apr 2011 to Mar 2012 was as warm as the previous record from the early 1990s. On the other hand, our measurements took place during the coldest period since 1988. Our measurement period covers, in other words, most of the temperature regime that can be expected in this region within a multi-decadal perspective. The depth of the fracture zone varies between 20 to 40 m (Fig. 4). Temperature penetration from the surface to such depths typically takes between one (20 m) to two years (40 m) (cf. e.g., Gruber et al., 2004a). There is, therefore, a good temporal link between the maximum ground temperature at 20-40 m deep (through at least the last 50-60 years) and the actual timing of the slide release.

### 3.4 Local lapse rate

As shown in Figure 7b our regression analysis shows a high correlation between the nearest mountain weather station located at Rihpojavri (502 m a.s.l., Fig. 1) and our local air temperature measurement site in Signaldalen valley (65 m a.s.l., Fig. 3b). Figure 9 reveals an annual median lapse rate of  $6.1\text{ }^{\circ}\text{C km}^{-1}$ , but with substantial seasonal and inter-annual variability. Lapse rates are smallest ( $4\text{--}6\text{ }^{\circ}\text{C km}^{-1}$ ) in late-summer to early autumn, and largest ( $7\text{--}10\text{ }^{\circ}\text{C km}^{-1}$ ) in spring. We see the strongest gradients in spring (May).

The monthly temperature difference ( $\Delta T$ ) between calculated air temperature and measured rock face temperatures are shown in Figure 10. For the sites R03, R04 and R12, periods during which the loggers obviously had been covered by snow were omitted. Monthly values were calculated in the same way as used for the lapse-rate calculations (cf. section 3.4, Fig. 9). The results in Figure 10 show a clear aspect dependency with a slightly lower permafrost limit in northern exposition as opposed to slopes exposed to the South. The figure also shows the year-to-year variations in the order of  $\pm 0.5$  to  $1.0\text{ }^{\circ}\text{C}$ . There is a clear seasonal dependency, with  $\Delta T$  near  $0\text{ }^{\circ}\text{C}$  or even negative during autumn and early winter, and largest  $\Delta T$  ( $1.5$  to  $5\text{ }^{\circ}\text{C}$ ) in late spring and early summer.

Figure 11a shows the annual temperature difference ( $\Delta T$ ) between calculated air temperature and measured rock face temperatures and aspect dependency as derived from the data. The points represent the mean values and the black line is the best polynomial fit to the data ( $R^2 = 0.84$ ). The grey lines show the polynomial fit to the interquartile range of  $\Delta T$ . The  $\Delta T$  for logger R06, which is the logger facing most towards north ( $10^{\circ}$ ), is  $+0.6\text{ }^{\circ}\text{C}$  as compared to air temperature, while the two loggers facing most towards south (R05,  $90^{\circ}$  and R09,  $208^{\circ}$ ) show both a  $\Delta T$  of  $+1.7\text{ }^{\circ}\text{C}$ . We, thus, find an aspect difference between north and south facing loggers of  $1.1\text{ }^{\circ}\text{C}$ . Figure 11b shows the subsurface temperature field as modelled with the



stationary three-dimensional transient heat conduction model (Noetzli et al., 2007a, b) based on rock wall temperature data from 2009–2011. The figure shows a slice transecting Polvartinden mountain from South (left) to North (right).

#### 4 Discussion

Many studies related to mountain climate and permafrost research operate with uniform and/or constant lapse rates of 6.0 or 6.55 °C km<sup>-1</sup>, justifying this by these values being the typical theoretical adiabatic lapse rate. However, theoretical adiabatic lapse rate can vary considerably (from 3 to 9 °C km<sup>-1</sup> for surface conditions at mid-latitudes) due to its dependency on pressure and temperature (Minder et al., 2010). In valley bottoms temperature inversions and cold air pooling can affect lapse rates (e.g., Rolland, 2003), and channelled flow over mountain passes can result in large local temperature anomalies (e.g., Steenburgh et al., 1997).

Our study suggest that the high lapse rate values we find in Signaldalen in spring are caused by the fact that the snow cover normally is depleted in the valley bottom in late spring, while the higher areas and the northerly exposed moderately steep mountain slopes still exhibit an extensive snow cover. These results are in accordance with ~~international literature (e.g., Minder et al., 2010)~~ and are likely applicable to other mountainous areas in northern Norway. Other studies have also shown that seasonal cycles in lapse rates have similar amplitudes to those found in our study, but that the phasing of the seasonality varies (Bolstad et al., 1998; Rolland, 2003; Tang and Fang, 2006; Blandford et al., 2008; Gardner et al., 2009). They also highlight the importance of local air temperature measurements in experimental observational networks to reduce uncertainty. Our results clearly support these findings.

Our measured MAGST values from the period 2009–2013 indicate warm/marginal permafrost at all temperature logger sites except at the valley site (SD02, 65 m a.s.l.) and at a wet, mossy depression site on the lower part of the ridge (S13). Our results yield an estimated mean lower limit of permafrost at around 600–650 m a.s.l.; this value is in agreement with earlier estimates in the inner fjord- and valley areas of Troms (Isaksen et al. 2011a; Farbrot et al., 2013; Gissnås et al., 2016) and coincides with the upper limit of the failure zone. Since all rock wall loggers are installed at small cliffs (rather than in vertical, large rock walls) the snow close and/or atop these cliffs can attenuate normal winter cooling and, thus, affect the results during the winter months. This is visible in Figure 10, where some of the NE-facing loggers exhibit a clearly higher winter temperatures than what would be expected when compared with air temperature. Some of the logger sites feature moss or thin vegetation (like the mountainside otherwise) which also affects the temperature. Together, the loggers (including the soil loggers) encompass the variation of the snow and surface conditions present around the Signaldalen rock slide site.

The long-term development in the annual mean temperatures from the instrumental period (the late 1800-century) in northern Norway can be split into four periods: a cold period in the beginning, a period referred to as “early 20<sup>th</sup> century warming”



culminating in the 1930s, a period with cooling from the 1930s to the 1960s, and finally the “recent warming” from the 1960s to present (Hanssen-Bauer et al., 2015). Regional climate data since 1958 from Skibotn weather station suggest a general warming of the greater Signaldalen area. This is in agreement with the general atmospheric warming (Hanssen-Bauer et al., 2015) and observed permafrost temperature rise (Isaksen et al., 2007) and the long-term permafrost degradation (Farbrot et al., 2013) in northern-Norway, with an observed peak ~~during the International Polar Year~~ 2007–2009 (Christiansen et al., 2011; Romanovsky et al., 2016). The CG2 model results suggest (not shown) an increase of the lower permafrost limit for snow covered sites from ca. 600 m a.s.l. in the 1960s to about 800 m a.s.l. between 2000–2010 (Westermann, personal communication, 2015). Our modelled data (Fig. 8) and observed ground temperature data from the nearby Guolasjávri permafrost borehole (Fig. 12, see location in Fig. 1) suggest that the highest mean near surface temperatures on record occurred in the period between March 2007 and February 2008, thus ending only a few months before the Signaldalen rockslide detached.

According to a study by Fischer et al. (2012) on potential triggering factors at 56 historical rockslide and rock fall events in the Alps, it seems to be the marginal permafrost zones where most of the recent changes concerning ice content and hydrology have taken place; parameters that are seen as having an important influence on slope stability also by, e.g., Allen and Huggel (2013), Deline et al. (2011) and Fischer et al. (2013). In laboratory studies, Davies et al. (2001) demonstrated that the shear strength of an ice-bonded rock discontinuity significantly reduces with warming and that the minimum shear stress is reached between ca. -0.5 and 0 °C. Analysing temperature conditions prior to 144 past rockfall events in the Swiss Alps and the French Mont Blanc massive, Lüthi et al. (2015) recently showed that small to medium-sized rockfalls (with volumes up to 100'000 m<sup>3</sup>) mainly occurred during short-term periods of unusually high temperatures, whereas larger high-elevation rock slope failures occur all year-round. Hasler et al. (2011) showed that local warming of cold permafrost may be induced by advection and the related erosion of cleft ice, and that permafrost degradation through thermal advection by running water can rapidly lead to the development of deep thaw corridors along fracture zones and potentially destabilise much larger volumes of rock than through thermal conduction on similar timescales.

25

In Scandinavia, the amount of direct observations about the influence of solar radiation on near surface temperatures in different aspects of steep mountain walls is limited so far. Generally, the influence of direct solar radiation is less pronounced at high latitudes than in mid-latitude mountain ranges, a fact which can be observed in our modelling results of the subsurface temperature field (Fig. 11b). Our results indicate an altitudinal difference of several tens of meters between northerly and southerly aspect, as compared to several hundred meters in, e.g., the Swiss Alps (cf. Gruber et al., 2004). Due to our small sample size these results should be seen as tentative estimates. Also, the potential effect of the midnight sun has been not been looked at. In addition, it has to be noted that we lack loggers exposed directly to the South. Based on the shape of the polynomial fit curve (Fig. 11a), and on what is known from other studies (e.g., Gruber et al., 2004a; Gruber et al., 2004a; Noetzli and Gruber, 2009), the difference between northerly and southerly aspects is probably 0.2 to 0.4 °C higher than indicated by our

30



measurements. This would yield an absolute difference between "warmest" and "coldest" aspects of approximately 1.3 to 1.5 °C, which still is considerably lower than for mid-latitude mountain ranges. Hipp et al. (2014) report comparably small aspect dependencies of the lower permafrost limit for a location in Southern Norway, thus supporting strongly decreasing aspect dependency with increasing latitude.

## 5 5 Conclusions

Analyses based on four-year ground surface temperature series suggest warm/marginal permafrost at several of the investigated sites in Signaldalen, and yield an estimated mean lower limit of permafrost at around 600-650 m a.s.l., an altitude which coincides with the upper limit of the failure zone. Regional climate data since 1958 and nearby borehole data suggest a general warming and that the highest mean near surface temperatures on record occurred some months before the Signaldalen rockslide detached. These findings are supported by model results of the transient permafrost model CG2. Our results give also new insights into aspect dependency of mountain permafrost in northern Scandinavia, a subject that so far has been little explored.

The volume calculation based on terrestrial laser scanning data show that the depth to the actual failure surface was found to range from 40 m at the back to 0 m at the toe. The repeated laser scanning between 2009 and 2013 show little to no activity in both the 2008 failure zone and the adjacent rock slopes. Considering that temperature penetration to, e.g., 15–20 m depth in frozen rock typically takes one year it is likely that changing rock-/ice-temperatures due to the general warming and in response to the extreme warm previous year have played an important role in the detaching of the Signaldalen slide.

## Acknowledgements

The work of Regula Frauenfelder was funded by the Norwegian Research Council (through its base funding to NGI), the work of Ketil Isaksen was funded through the Norwegian Meteorological Institute, all this funding is greatly acknowledged. We are indebted to Leif Skogli (Signaldalen) who let us install loggers on his property and helped with the logistics during the laser scanning. We would also like to thank Steinar Engsted (former employee at Storfjord municipality) for his interest in our work. Kjetil Brattlien (NGI), Gunnar Kristensen (NVE) and Gunilla Kaiser are thanked for letting us use their imagery. Herman Farbrot, Gunilla Kaiser and Kristin Sæterdal Myhra are acknowledged for their help in the field. Last but certainly not least, Sebastian Westermann (UiO) deserves a great thank for running his CG2 model for us and letting us use the according results.



## References

- Allen, S. K., Cox, S. C., and Owens, I. F.: Rock avalanches and other landslides in the central Southern Alps of New Zealand: a regional study considering possible climate change impacts, *Landslides*, 8, 33–48, doi:10.1007/s10346-010-0222-z, 2011.
- 5 Allen, S. and Huggel, C.: Extremely warm temperatures as a potential cause of recent high mountain rockfall, *Global and planetary change*, 107 (2013), 59–69, 2013.
- Auer, I., Böhm, R., Jurkovic, A., Lipa, W., Orlik, A., Potzmann, R., Schöner, W., Ungersböck, M., Matulla, C., Briffa, K., Jones, P., Efthymiadis, D., Brunetti, M., Nanni, T., Maugeri, M., Mercalli, L., Mestre, O., Moisselin, J.-M., Begert, M., Müller-Westermeier, G., Kveton, V., Bochnicek, O., Stastny, P., Lapin, M., Szalai, S., Szentimrey, T., Cegnar, T.,  
10 Dolinar, M., Gajic-Capka, M., Zaninovic, K., Majstorovic, Z., and Nieplová, E.: HISTALP - Historical instrumental climatological surface time series of the Greater Alpine Region. *Int J Climatol* 27(1):17–46, 2007.
- Ballantyne, C.K.: The Holocene glacial history of Lyngshalsvøya, northern Norway- chronology and climatic implications., *Boreas*, 19 (2), 93–117, 1990.
- Bakke, J., Dahl, S.O., Paasche, O., Lovlie, R., and Nesje, A.: Glacier fluctuations, equilibrium-line altitudes and palaeoclimate  
15 in Lyngen, northern Norway, during the Lateglacial and Holocene, *The Holocene*, 15 (4), 518–540, 2005.
- Barla, G., Dutto, F., and Mortara, G.: Brenva Glacier rock avalanche of 18 January 1997 on the Mont Blanc range, northwest Italy, *Landslide News*, 13, 2–5, 2000.
- Blandford, T. R., Humes, K. S., Harshburger, B. J., Moore, B. C., Walden, V. P. and Ye, H.: Seasonal and Synoptic  
20 Variations in Near-Surface Air Temperature Lapse Rates in a Mountainous Basin, *Journal of Applied Meteorology and Climatology*, 47(1), 249–261, doi:10.1175/2007JAMC1565.1, 2008.
- Blikra, L. H. and Christiansen, H. H.: A field-based model of permafrost-controlled rockslide deformation in northern Norway, *Geomorphology*, 208, 34–49, doi:10.1016/j.geomorph.2013.11.014, 2014.
- Blikra, L. H., Christensen, H. H., Kristensen, L., and Lovisolo M.: Characterization, Geometry, Temporal Evolution and  
25 Controlling Mechanisms of the Jettan Rock-Slide, Northern Norway, *Engineering Geology for Society and Territory- Volume 2*. Springer International Publishing, 273–278, 2015.
- Blikra, L. H., Longva, O., Braathen, A., Anda, E., Dehls, J. F., Stalsberg, K.: Rock slope failures in Norwegian fjord areas; examples, spatial distribution and temporal pattern, *Landslides From Massive Rock Slope Failure*, Springer Dordrecht, The Netherlands, 475–496, 2006.
- Bolstad, P. V., Swift, L., Collins, F. and Régnière, J.: Measured and predicted air temperatures at basin to regional scales in  
30 the southern Appalachian mountains, *Agricultural and Forest Meteorology*, 91(3–4), 161–176, doi:10.1016/S0168-1923(98)00076-8, 1998.



- Brunetti, M., Lentini, G., Maugeri, M., Nanni, T., Auer, I., Böhm, R., and Schöner, W.: Climate variability and change in the Greater Alpine Region over the last two centuries based on multivariable analysis. *Int J Climatol* 29(15), 2197–2225, 2009.
- Christiansen, H. H., Etzelmüller, B., Isaksen, K., Juliussen, H., Farbrot, H., Humlum, O., Johansson, M., Ingeman-Nielsen, T.,  
5 Kristensen, L., Hjort, J., Holmlund, P., Sannel, A. B. K., Sigsgaard, C., Åkerman, H. J., Foged, N., Blikra, L. H., Pernosky, M. A., and Ødegård, R.: The Thermal State of Permafrost in the Nordic area during the IPY 2007-2009, *Permafrost and Periglacial Processes* 21, 156–181, DOI: 10.1002/ppp.687, 2010.
- Cola, G.: The large landslide of the south-east face of Thurwieser peak (Thurwieser-Spitze) 3658 m (Upper Valtellina, Italy), *Terra Glacialis*, 8, 38–45, 2005.
- 10 Crosta, G. B., Chen, H., and Lee, C. F.: Replay of the 1987 Val Pola Landslide, Italian Alps, *Geomorphology*, 60, 127–146, 2004.
- Davies, M. C. R., Hamza, O., and Harris, C.: The effect of rise in mean annual temperature on the stability of rock slopes containing ice-filled discontinuities, *Permafrost Periglac. Process.*, 12, 137–144. doi:10.1002/ppp.378, 2001.
- Deline, P., Alberto, W., Broccolato, M., Hungr, O., Noetzli, J., Ravanel, L., and Tamburini, A.: The December 2008 Crammont  
15 rock avalanche, Mont Blanc massif area, Italy, *Nat. Hazards Earth Syst. Sci.*, 11, 3307–3318, doi:10.5194/nhess-11-3307-2011, 2011.
- Engeset, R., Tveito, O. E., Alfnes, E., Mengistu, Z., Udnæs, H.-C., Isaksen, K., and Førland, E. J.: Snow map system for Norway, 23<sup>rd</sup> Nordic Hydrological Conference, Tallin, Estonia. NHP Report 48, 112–121, 2004.
- Etzelmüller, B., Berthling, I. and Sollid, J. L.: Aspects and concepts on the geomorphological significance of Holocene  
20 permafrost in southern Norway, *Geomorphology*, 52(1–2), 87–104, doi:http://dx.doi.org/10.1016/S0169-555X(02)00250-7, 2003.
- Evans, S. G. and Clague, J. J.: Recent climatic change and catastrophic geomorphic processes in mountain environments, *Geomorphology*, 10, 107–128, 1994.
- Farbrot, H., Isaksen, K., and Etzelmüller, B.: Present and past distribution of mountain permafrost in the Gaissane Mountains,  
25 northern Norway, *Proceedings of the Ninth International Conference on Permafrost*, Kane, D. L., Hinkel, K. M. (eds), Institute of Northern Engineering, University of Alaska Fairbanks, Fairbanks, Alaska, USA, 427–432, 2008.
- Farbrot, H., Isaksen, K., Etzelmüller, B., and Gislås, K.: Ground Thermal Regime and Permafrost Distribution under a Changing Climate in Northern Norway, *Permafrost and Periglacial Processes*, DOI: 10.1002/ppp.1763, 2013.
- Fischer, L., Purves, R.S., Huggel, C., Noetzli, J. and Haeberli, W.: On the influence of topographic, geological and cryospheric  
30 factors on rock avalanches and rockfalls in high-mountain areas, *Natural Hazards and Earth System Sciences* 12, 241–254, 2012.
- Fischer, L., Huggel, C., Käab, A., and Haeberli, W.: Slope failures and erosion rates on a glacierized high-mountain face under climatic changes, *Earth surface processes and landforms*, 38 (8), 836-846, 2013.





- Frauenfelder, R., Isaksen, K., Noetzli, J., Lato, M. J., Smebye, H. C.: Analysing ground temperatures and geomechanical mapping of the 2008 Signaldalen rock slide. A case study from Northern Norway, Extended abstract 6th Canadian GeoHazards Conference - GeoHazards 6, 2014.
- Gardner, A. S., Sharp, M. J., Koerner, R. M., Labine, C., Boon, S., Marshall, S. J., Burgess, D. O. and Lewis, D.: Near-Surface  
 5 Temperature Lapse Rates over Arctic Glaciers and Their Implications for Temperature Downscaling, *Journal of Climate*, 22(16), 4281–4298, doi:10.1175/2009JCLI2845.1, 2009.
- Geertsema, M., Clague, J. J., Schwab, J. W., and Evans, S. G.: An overview of recent large catastrophic landslides in northern British Columbia, Canada, *Eng. Geol.*, 83, 120–143, 2006.
- Gisnås, K., Etzelmüller, B., Lussana, C., Hjort, J., Sannell, A. B. K., Isaksen, K., Westermann, S., Kuhry, P., Christiansen, H.  
 10 H.: Permafrost map for Norway, Sweden and Finland, accepted for publication in *Permafrost and Periglacial Processes*, 2016.
- Gobiet, A., Kotlarski, S., Beniston, M., Heinrich, G., Rajczak, J., Stoffel, M.: 21<sup>st</sup> century climate changes in the European Alps – A review, *Science of The Total Environment*, 493, 1138–1151, 2014.
- Gruber, S., Hoelzle, M., and Haeberli, W.: Permafrost thaw and destabilization of Alpine rock walls in the hot summer of  
 15 2003, *Geophys. Res. Lett.*, 31, L13504, doi:10.1029/2004GL020051, 2004a.
- Gruber, S., Hoelzle, M., and Haeberli, W.: Rock wall temperatures in the Alps – modelling their topographic distribution and regional differences, *Permafrost and Periglacial Processes* 15(3): 299–307, 2004b.
- Gruber, S., Peter, M., Hoelzle, M., Woodhatch, I., and Haeberli, W.: Surface temperatures in steep Alpine rock faces - a strategy for regional-scale measurement and modelling, *Proceedings of the 8th International Conference on Permafrost*  
 20 2003, Zurich, Switzerland, 325–330, 2003.
- Haeberli, W., Hölzle, M., Paul, F., and Zemp, M.: Integrated monitoring of mountain glaciers as key indicators of global climate change: the European Alps. *Ann Glaciol* 46:150–160, 2007.
- Haeberli, W. and Gruber, S.: Global warming and mountain permafrost, in Margesin, R. (ed.), *Permafrost soils*. Berlin, Springer, 205–218, 2009.
- 25 Haeberli, W., Noetzli, J., Arenson, L., Delaloye, R., Gärtner-Roer, I., Gruber, S., Isaksen, K., Kneisel, C., Krautblatter, M., Phillips, M.: Mountain permafrost: development and challenges of a young research field, *Journal of Glaciology* 56 (200), 1043–1058, 2010.
- Haeberli, W., Huggel, C., Kääb, A., Polkvoj, A., Zotikov I., and Osokin, N.: The Kolka-Karmadon rock/ice slide of 20 September 2002: An extraordinary event of historical dimensions in North Ossetia, Russian Caucasus, *J. Glaciol.*, 50,  
 30 533–546, 2004.
- Hanssen-Bauer, I., Førland, E. J., Haddeland, I., Hisdal, H., Mayer, S., Nesje, A., Nilsen, J. E. Ø., Sandven, S., Sandø, A.B., Sorteberg, A., Ådlandsvik, B. (Eds): *Klima i Norge 2100 – Kunnskapsgrunnlag for klimatilpasning oppdatert i 2015*, NCCS report no. 2/2015, <https://klimaservicesenter.no/> (in Norwegian), 2015.



- Harris, C. and 21 others: Permafrost and climate in Europe: Monitoring and modelling thermal, geomorphological and geotechnical responses, *Earth-Science Reviews* 92(3-4), 117-171, 2009.
- Hasler, A., Gruber, S., and Beutel, J.: Kinematics of steep bedrock permafrost, *Journal of Geophysical Research* 117: F01016, doi:10.1029/2011JF001981, 2012.
- 5 Hipp, T. F., Etzelmüller, B., Westermann, S.: Permafrost in Alpine Rock Faces from Jotunheimen and Hurrungane, Southern Norway, *Permafrost and Periglacial Processes*, doi: 10.1002/ppp.1799, 2014.
- Huggel, C., Salzmann, N., Allen, S., Caplan-Auerbach, J., Fischer, L., Haeberli, W., Larsen, C., Schneider, D., and Wessels, R.: Recent and future warm extreme events and high-mountain slope stability, *Philosophical Transactions of the Royal Society of London A: Mathematical, Physical and Engineering Sciences* 368.1919, 2435-2459, 2010.
- 10 Isaksen, K., Blikra, L. H., and Eiken, T.: The existence of warm permafrost in unstable rock slopes in western and northern Norway, *Geophysical Research Abstracts* 13, EGU2011-10942, EGU General Assembly, 2011a.
- Isaksen, K., Blikra, L. H., Eiken, T., and Sollid, J. L.: Mountain permafrost and instability of rock slopes in western and northern Norway, *PACE21 Field Workshop, Longyearbyen, Svalbard*, 2004.
- Isaksen, K., Sollid, J. L., Holmlund, P., and Harris, C.: Recent warming of mountain permafrost in Svalbard and Scandinavia, *Journal of Geophysical Research* 112, F02S04, doi:10.1029/2006JF000522, 2007.
- 15 Isaksen, K., Farbot, H., Blikra, L. H. Johansen, B., and Sollid, J. L.: Five-year ground surface temperature measurements in Finnmark, northern Norway, *Proceedings of the Ninth International Conference on Permafrost*, Kane, D. L., Hinkel, K. M. (eds), Institute of Northern Engineering, University of Alaska Fairbanks, Fairbanks, Alaska, USA, 789–794, 2008.
- Isaksen, K., Ødegård, R.S., Etzelmüller, B., Hilbich, C., Hauck, C., Farbot, H., Eiken, T., Hygen, H. O., and Hipp, T. F.: Degrading mountain permafrost in southern Norway: Spatial and temporal variability of mean ground temperatures, 1999-2009, *Permafrost and Periglacial Processes*. doi: 10.1002/ppp.728, 2011b.
- 20 Jin, H., Li, S., Cheng, G., Wang, S., and Li, X.: Permafrost and climatic change in China, *Global Planet. Change*, 26(4), 387–404, 2000.
- Juliussen, H., Christiansen, H. H., Strand, G. S., Iversen, S., Midttømme, K., Rønning, J.S.: NORPERM, the Norwegian Permafrost Database—a TSP NORWAY IPY legacy, *Earth System Science Data*, 2, 235-246, doi:10.5194/essd-2-235-2010, 2010.
- 25 King, L.: Zonation and Ecology of High Mountain Permafrost in Scandinavia, *Geografiska Annaler. Series A, Physical Geography*, 68(3), 131, doi:10.2307/521452, 1986.
- Lilleøren, K., Etzelmüller, B., Gislås, K., Humlum, O.: The relative age of mountain permafrost-estimation of Holocene permafrost limits in Norway, *Global and Planetary Change*, 92, 2012.
- 30 Luethi, R., Gruber, S., Ravel, L.: Modelling transient ground surface temperatures of past rockfall events: towards a better understanding of failure mechanisms in changing periglacial environments, *Geografiska Annaler: Series A, Physical Geography*, xx, 1–15, DOI:10.1111/geoa.12114, 2015.



- Marchenko, S. S., Gorbunov, A. P., and Romanovsky, V. E.: Permafrost warming in the Tien Shan mountains, Central Asia, *Global Planet. Change*, 56(3–4), 311–327, 2007.
- Minder, J. R., Mote, P. W., and Lundquist, J. D.: Surface temperature lapse rates over complex terrain: Lessons from the Cascade Mountains, *Journal of Geophysical Research*, 115(D14), doi:10.1029/2009JD013493, 2010.
- 5 Mohr, M.: Comparison of versions 1.1 and 1.0 of gridded temperature and precipitation data for Norway. met.no note 19/2009 (<http://met.no/filestore/note19-09.pdf>), 2009.
- Myhra, K. S., Westermann, S., and Etzelmüller, B.: Modelled Distribution and Temporal Evolution of Permafrost in Steep Rock Walls Along a Latitudinal Transect in Norway by CryoGrid 2D, *Permafrost and Periglacial Processes*, doi:10.1002/ppp.1884, 2015.
- 10 NGU: Produktspesifikasjon ND Løsmasser, Norges Geologiske Undersøkelser, 37/99, 2010. (In Norwegian)
- Noetzli, J., Gruber, S., and Friedel, S.: Modeling transient permafrost temperatures below steep alpine topography, COMSOL User Conference, Grenoble, 139-143, 2007a.
- Noetzli, J., Gruber, S., Kohl, T., Salzmann, N., and Haeberli, W.: Three-dimensional distribution and evolution of permafrost temperatures in idealized high-mountain topography, *Journal of Geophysical Research: Earth Surface*, 112, 2007b.
- 15 Noetzli, J., and Gruber, S.: Transient thermal effects in Alpine permafrost, *The Cryosphere*, 3: 85-99, 2009.
- Oppikofer, T., Jaboyedoff, M., and Keusen, H.-R.: Collapse at the eastern Eiger flank in the Swiss Alps, *Nat. Geosci.*, 1, 31–535, 2008.
- Ødegård, R. S., Hoelzle, M., Vedel Johansen, K. and L. Sollid, J.: Permafrost mapping and prospecting in southern Norway, *Norsk Geografisk Tidsskrift - Norwegian Journal of Geography*, 50(1), 41–53, doi:10.1080/00291959608552351, 1996.
- 20 Phillips, M., Wolter, A., Lüthi, R., Amann, F., Kenner, R., Bühler, Y.: Rock slope failure in a recently deglaciated permafrost rock wall at Piz Kesch (Eastern Swiss Alps), February 2014, *Earth Surface Processes and Landforms*, doi: 10.1002/esp.3992, 2016.
- Ravanel, L. and Deline, P.: Climate influence on rockfalls in high-Alpine steep rockwalls: the north side of the Aiguilles de Chamonix (Mont Blanc massif) since the end of the Little Ice Age, *Holocene*, 21, 357–365,
- 25 doi:10.1177/0959683610374887, 2010.
- Rolland, C.: Spatial and Seasonal Variations of Air Temperature Lapse Rates in Alpine Regions, *Journal of Climate*, 16(7), 1032–1046, doi:10.1175/1520-0442(2003)016<1032:SASVOA>2.0.CO;2, 2003.
- Romanovsky, V. E., Smith, S. L., Isaksen, K., Shiklomanov, N. I., Streletskiy, D. A., Kholodov, A. L., Christiansen, H. H., Drozdov, D. S., Malkova, G. V., Marchenko, S. S.: Terrestrial permafrost, in “State of the Climate in 2015”, *Bulletin of the American Meteorological Society*, 97 (8), S149–S152, 2016.
- 30 Saloranta, T. M.: Simulating snow maps for Norway: description and statistical evaluation of the seNorge snow model, *The Cryosphere*, 6, 1323-1337, doi:10.5194/tc-6-1323-2012, 2012.



- Slagstad, T., Balling, N., Elvebakk, H., Midttømme, K., Olesen, O., Olsen, L., and Pascal, C.: Heat-flow measurements in Late Palaeoproterozoic to Permian geological provinces in south and central Norway and a new heat-flow map of Fennoscandia and the Norwegian–Greenland Sea, *Tectonophysics*, 473 (3–4), 341–361, 2009.
- Steenburgh, W. J., Mass, C. F. and Ferguson, S. A.: The Influence of Terrain-Induced Circulations on Wintertime Temperature and Snow Level in the Washington Cascades, *Weather and Forecasting*, 12(2), 208–227, doi:10.1175/1520-0434(1997)012<0208:TIOTIC>2.0.CO;2, 1997.
- Stoffel, M., Tiranti, D., and Huggel, C.: Climate change impacts on mass movements - case studies from the European Alps, *Science of the Total Environment*, 493 (2014): 1255-1266, 2014.
- Tang, Z. and Fang, J.: Temperature variation along the northern and southern slopes of Mt. Taibai, China, *Agricultural and Forest Meteorology*, 139(3–4), 200–207, doi:10.1016/j.agrformet.2006.07.001, 2006.
- Thoresen, M.: Kvartærgeologisk kart over Norge, tema jordarter, Norwegian Geological Survey, Trondheim, Norge, 1990. (In Norwegian).
- Tveito, O. E., Førland, E. J., Heino, R., Hanssen- Bauer, I., Alexandersson, H., Dahlstrøm, B., Drebs, A., Kern-Hansen, C., Vaarby Laursen, E., and Westman, Y.: Nordic temperature maps, Report no. 09/00 ([http://met.no/filestore/09\\_00.pdf](http://met.no/filestore/09_00.pdf)), DNMI, Oslo, 2000.
- Vavrus, S.: The role of terrestrial snow cover in the climate system, *Clim. Dyn.*, 29, 73–88, doi:10.1007/s00382-007-0226-0, 2007.
- Wang, Q., Fan, X., and Wang, M.: Recent warming amplification over high elevation regions across the globe, *Climate Dynamics*, 43, 87-101, doi:10.1007/s00382-013-1889-3, 2014.
- Westermann, S., Schuler, T. V., Gislås, K., and Etzel Müller, B.: Transient thermal modeling of permafrost conditions in Southern Norway, *The Cryosphere*, 7(2), 719–739, doi:10.5194/tc-7-719-2013, 2013.

## Table and Figures

**Table 1.** Values for subsurface properties as used in the stationary three-dimensional transient heat conduction modelling

| Subsurface property  | Value (Value range)                    |
|----------------------|----------------------------------------|
| Heat capacity        | 850 J kg <sup>-1</sup> K <sup>-1</sup> |
| Thermal conductivity | 2-2.5 Wm <sup>-1</sup> K <sup>-1</sup> |
| Density              | 2800-2900 kg m <sup>-3</sup>           |
| Water content        | 0.2-1 %                                |



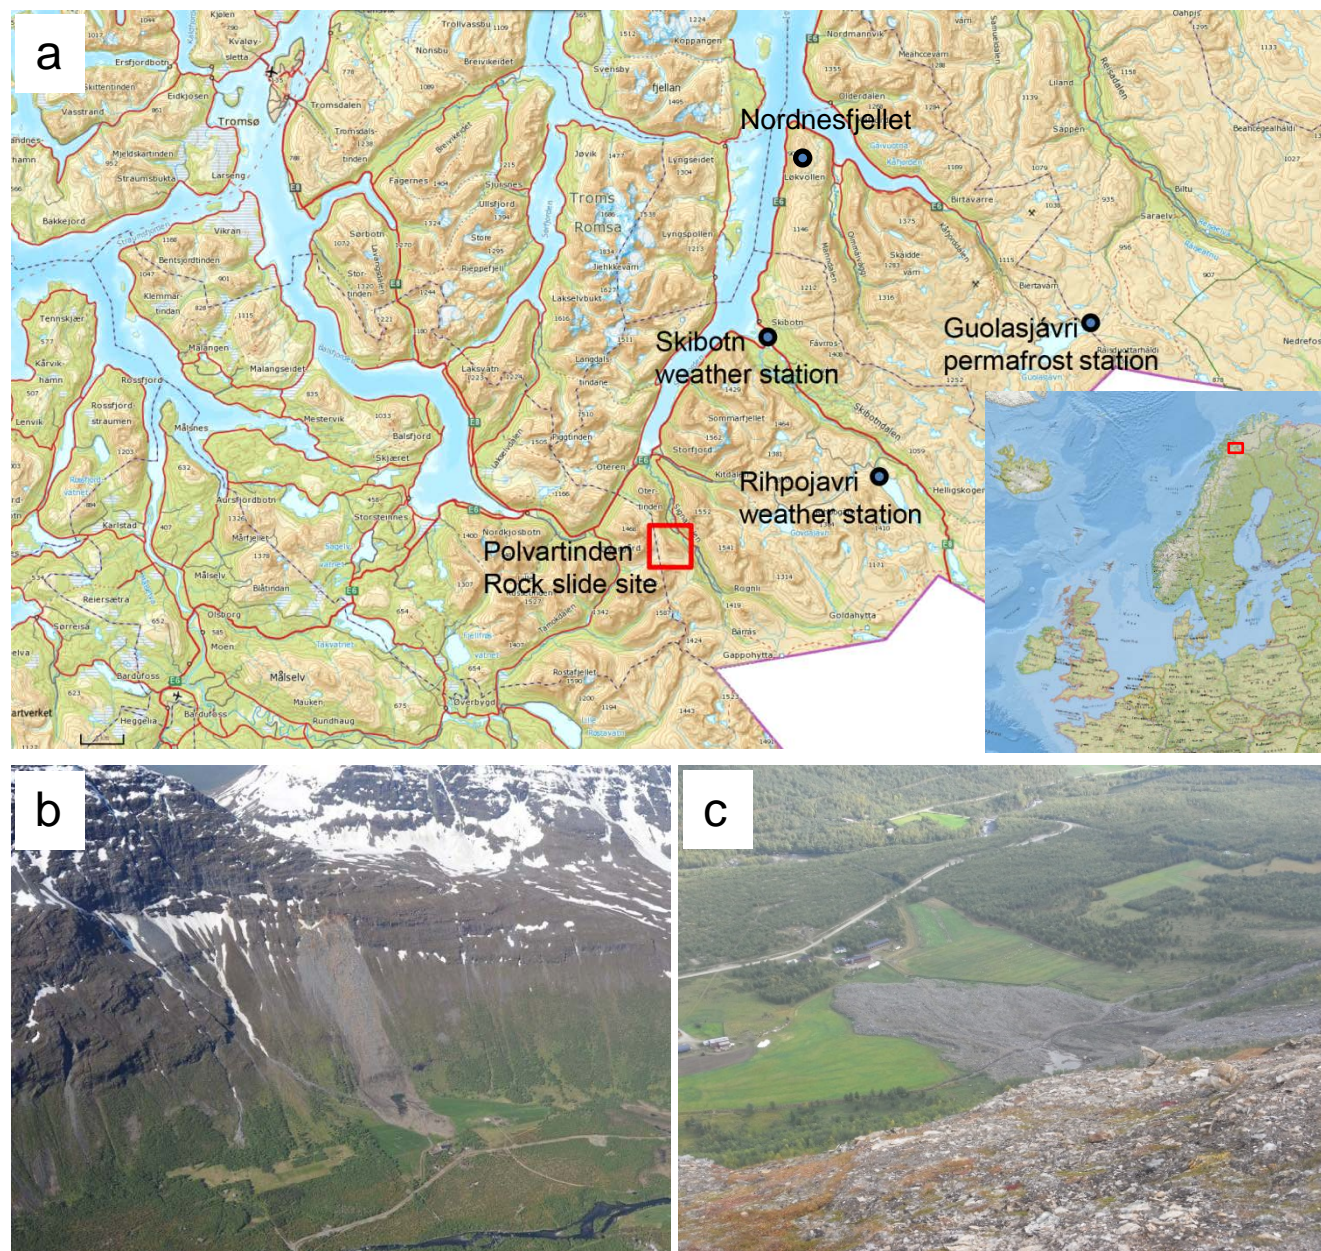

**Figure 1.** a) Key map showing the location of the Polvartinden rockslide site, the two weather stations and the permafrost station used in this study (map source: © by Norwegian Mapping Authority/Statens kartverk); b) Signalaldalen rockslide as seen from helicopter on 28.7.2009 (Photograph by courtesy of Gunnar Kristiansen, NVE); c) runout area of the Signalaldalen rockslide in September 2011 (Photograph by courtesy of Gunilla Kaiser).



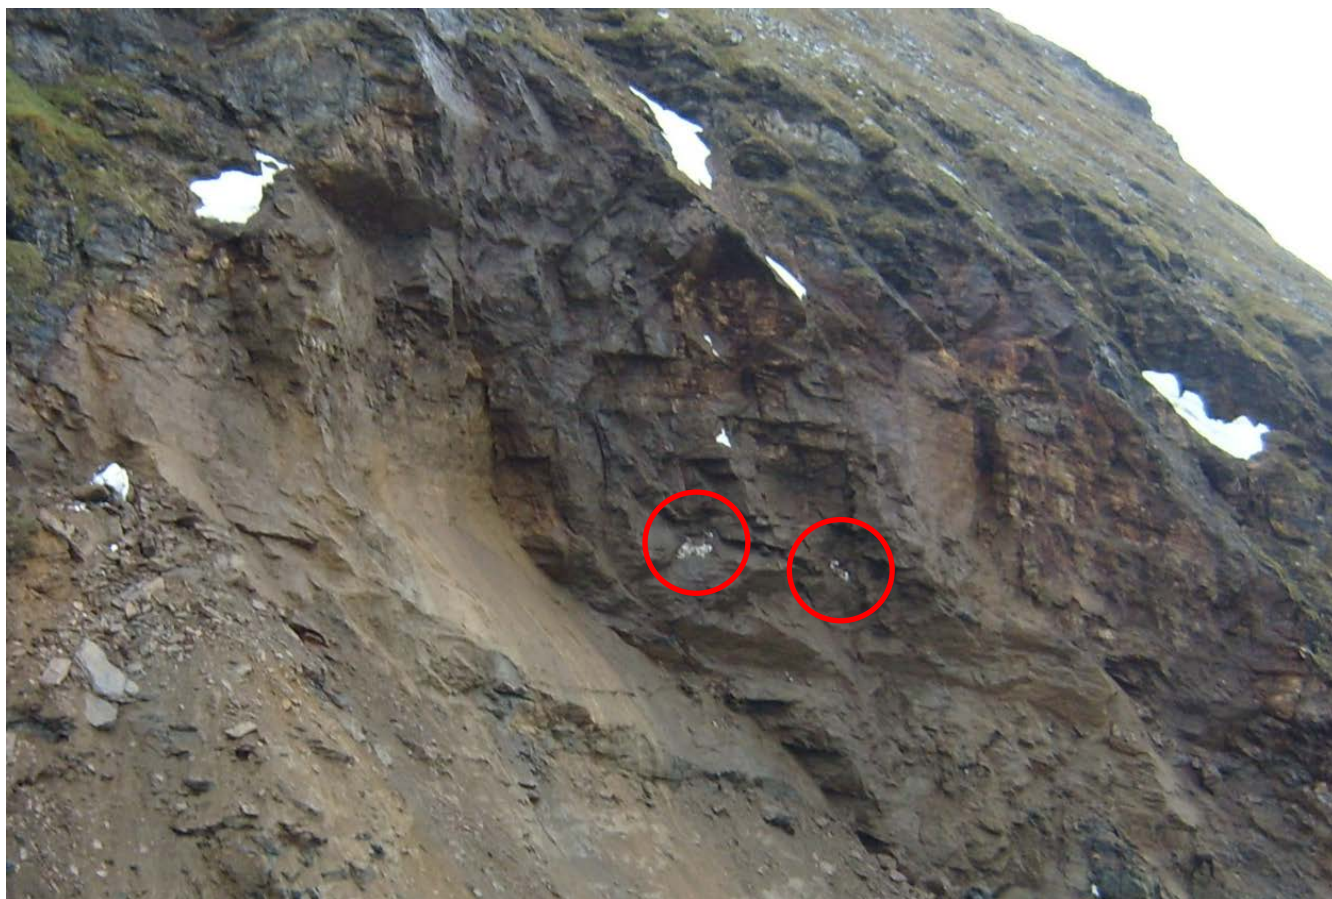

**Figure 2.** Visible in-situ ice (encircled areas) observed in the rockslide failure zone on June 26<sup>th</sup>, 2008. The photograph was taken a few hours after the event (Photograph by courtesy of Kjetil Brattlien, NGI).

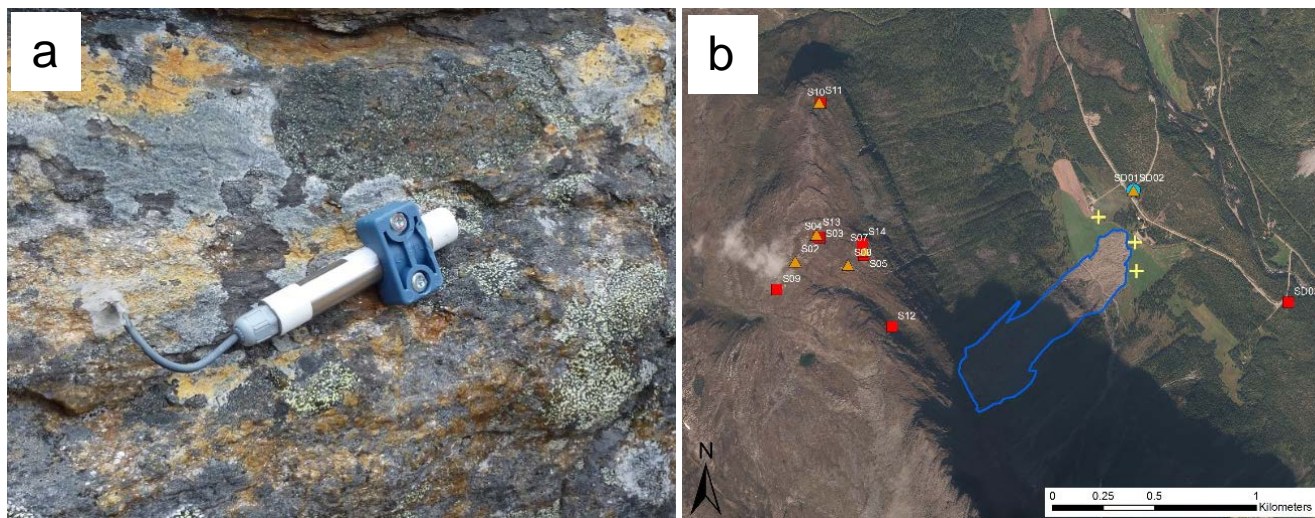

**Figure 3.** a) Typical logger installation setup; b) Map showing temperature measurement locations in vertical rock faces (red squares), within soil material (yellow triangles) and within a stone cairn (one blue circle in the valley bottom), the three yellow crosses mark the laser scanning locations. Slide outline in blue. Background: Aerial photograph (Copyright © by Norwegian Mapping Authority/Statens kartverk).



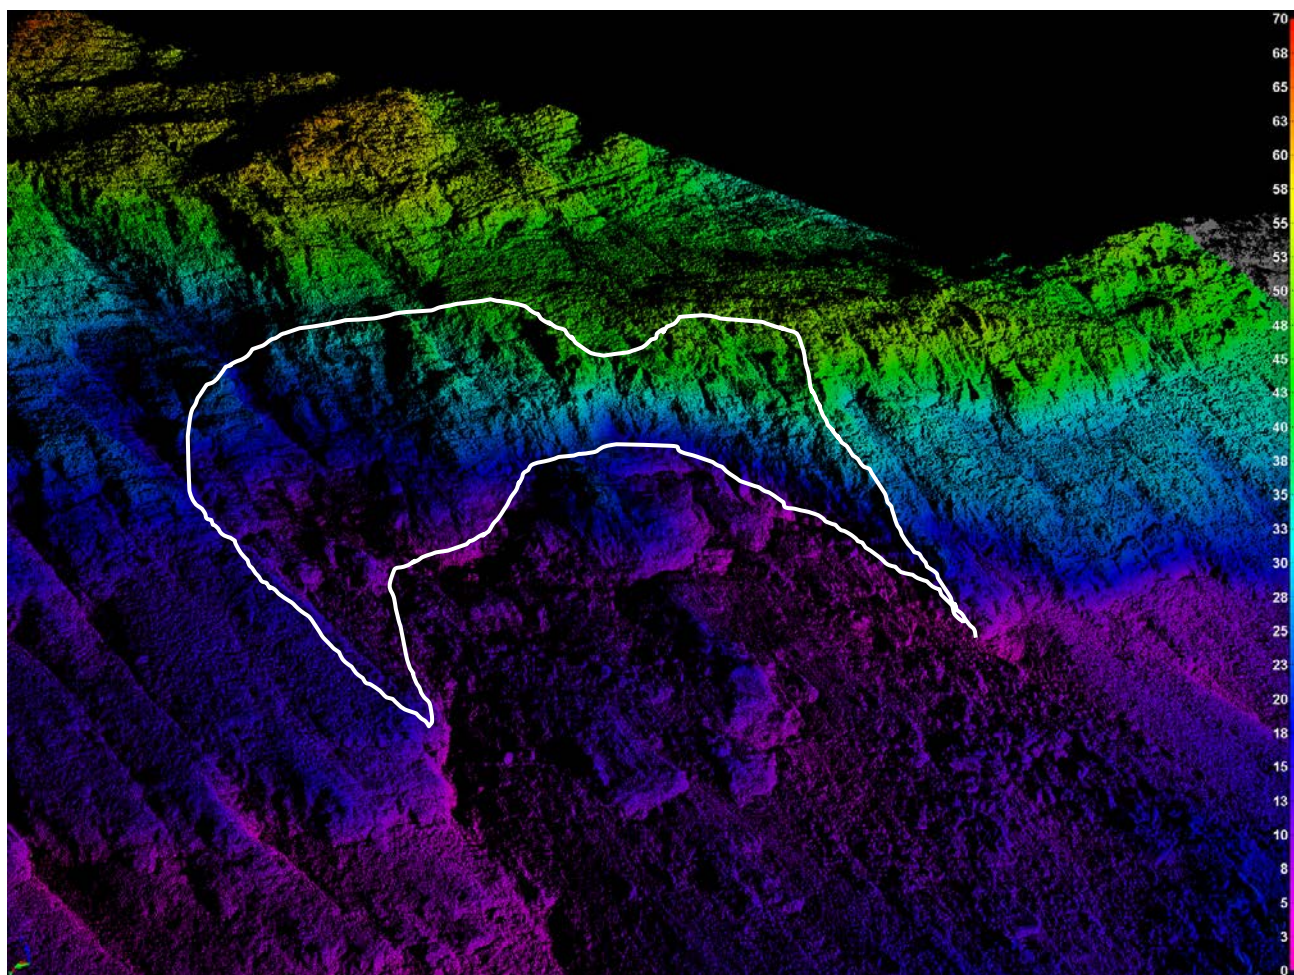

**Figure 4.** The failure zone of the Signaldalen rock slide (outlined in white) is a complex wedge much deeper to the plane of failure at its back than at the front. The colours indicate the distance in metres to the plane of failure (in purple).

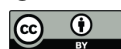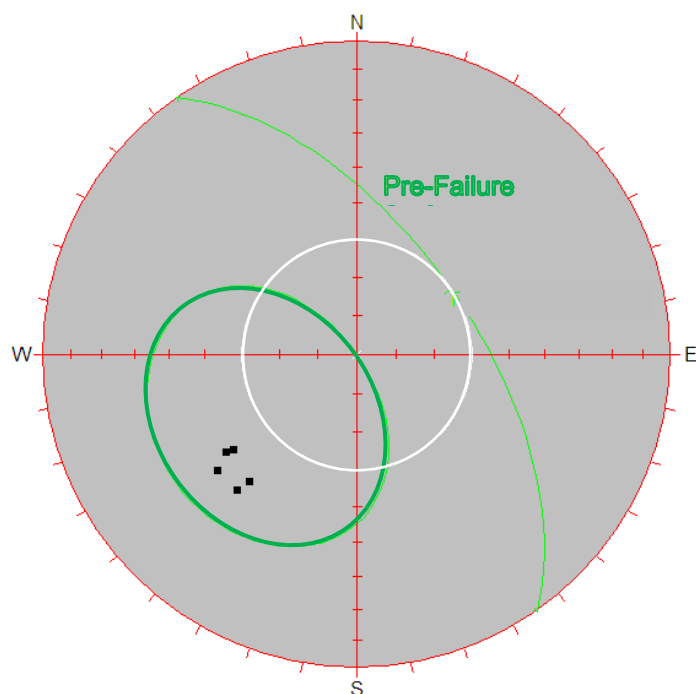

**Figure 5.** Kinematic analysis of the bedding planes for the sliding failure. The green line represents the orientation of the natural slope surface before failure, the white circle represents an estimated friction cone of  $30^\circ$  and the green cone represents the sliding daylight window for the associated pre-failure surface.

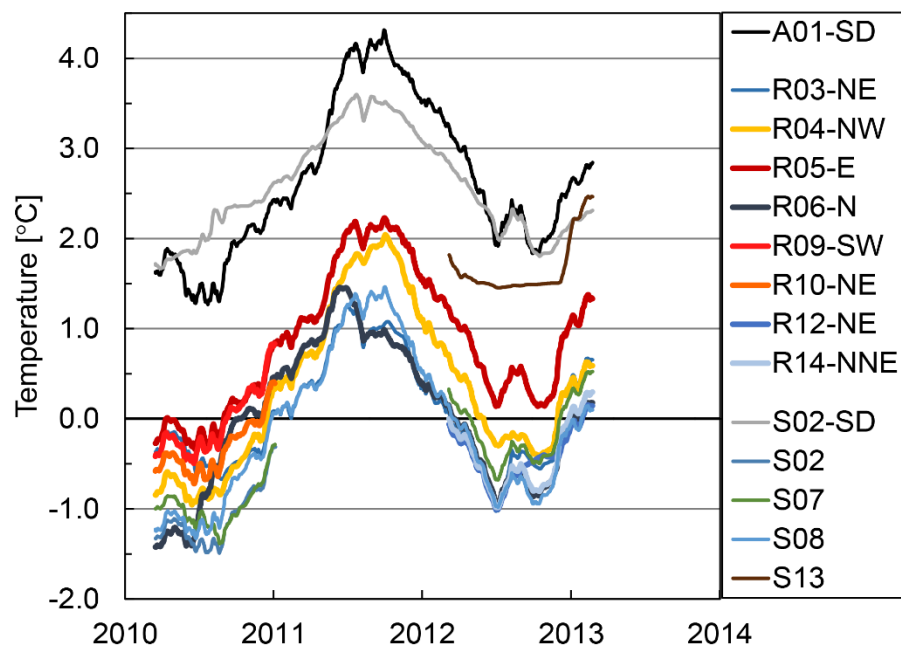

**Figure 6.** Mean annual ground surface temperatures (all except A01-SD) and air temperature (A01-SD) during the period Sept. 2009 to Aug. 2013 shown as simple moving 365-days average for all sites. To ensure that the temperature variability was not shifted in time, the mean values were centered (an equal number of days on either side of the mean value). A01-SD is air temperature in Signaldalen (SD), R03 to R14 are the rock face loggers and S02 to S13 are the soil temperature loggers.

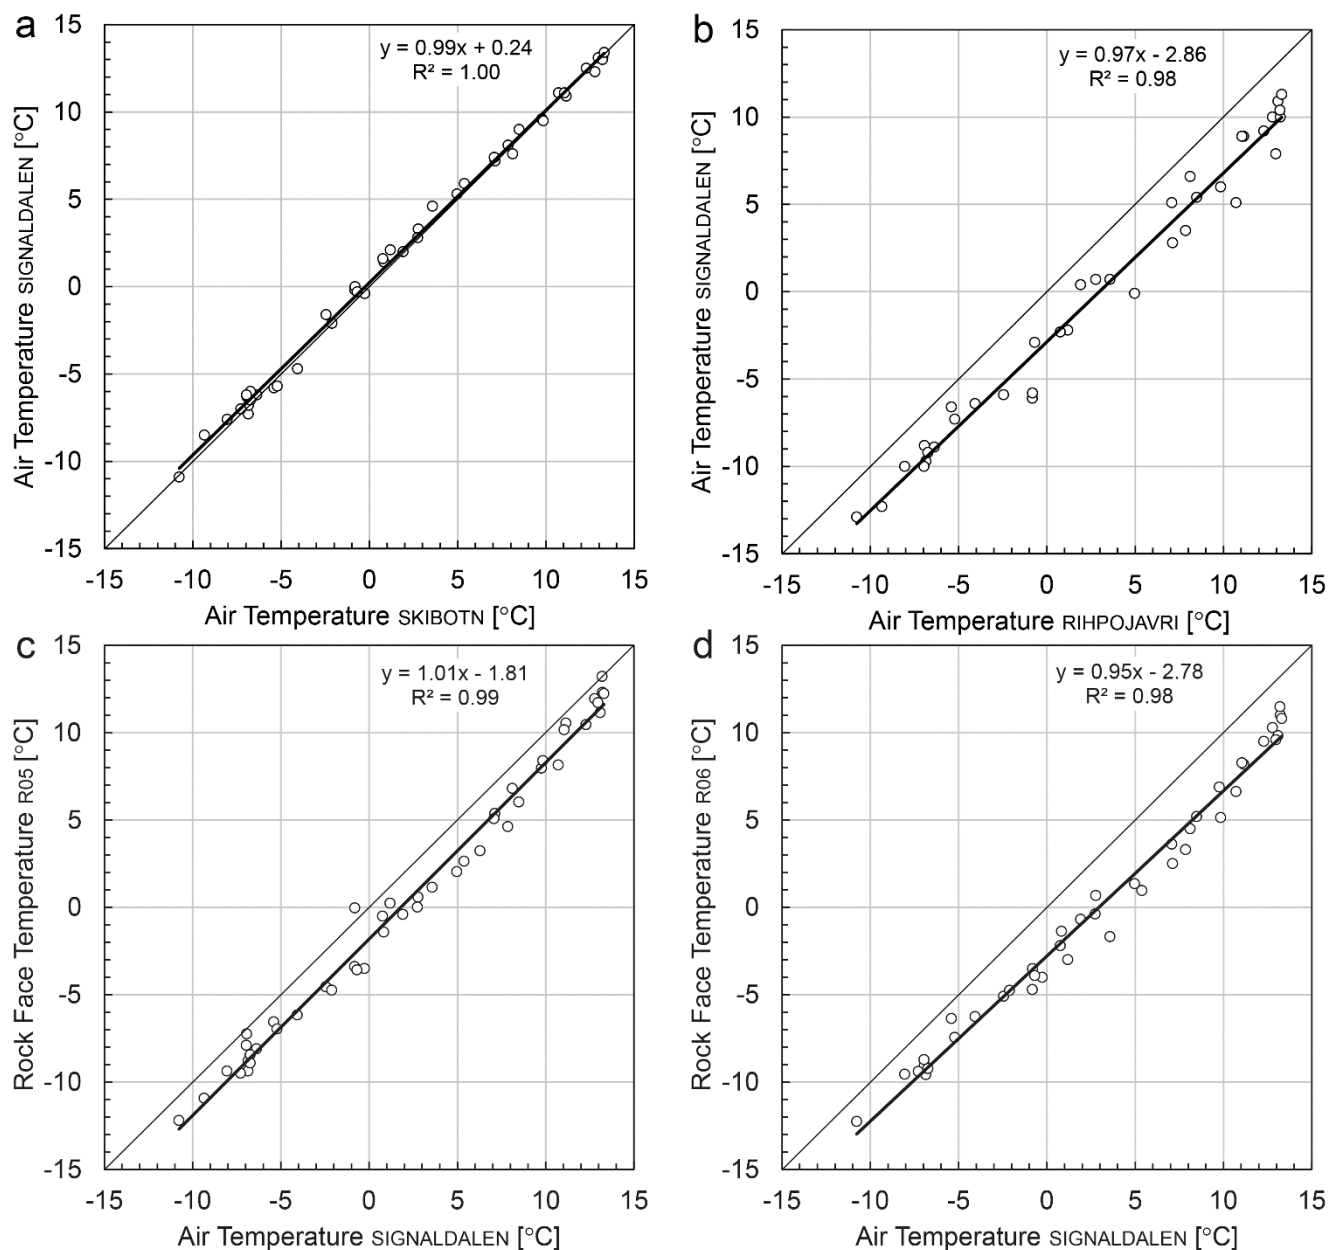

**Figure 7.** Scatter diagrams showing relations between monthly mean temperature for the main air temperature and rock face temperature series, including linear regression lines. (a) Relation between air temperature in Signaldalen and at meteorological station at Skibotn; (b) relation between air temperature in Signaldalen and air temperature measured at Rihpojavri weather station (25 km from Signaldalen); (c) and (d) relation between rock face temperature at logger site R05, respectively logger site R06 and air temperature in Signaldalen.

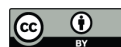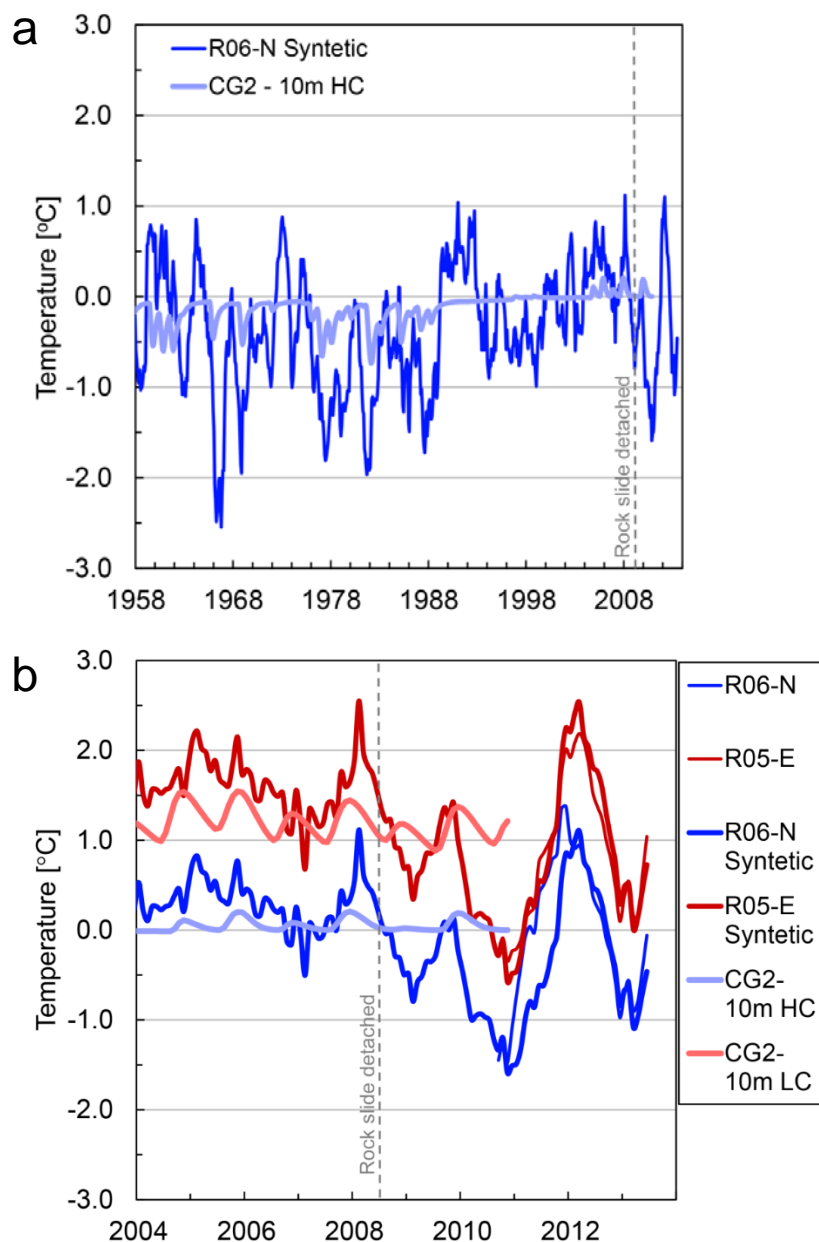

**Figure 8.** a) Synthetic series since 1958 of the coldest rock wall site (R06) based on the regression presented in Figure 7. Also shown is the transient permafrost model CryoGrid2 (CG2) run that calculates ground temperatures at 10 m depth according to conductive heat transfer in the soil and in the snowpack (Westermann et al., 2013). The CG2 model results are representative for areas at approximately 6659 m a.s.l. with slope gradients allowing for snow accumulation. The grey dotted line shows when the Signaldalen rock slide detached. b) The recent 10-year period for the synthetic series overlaid on the respective in-situ GST data for the lowest (R06, blue lines) and highest (R05, red lines) rock wall temperatures. Also shown are the CG2 model data runs at 10 m depth for High (HC) and Low (LC) thermal conductivity of the snow.

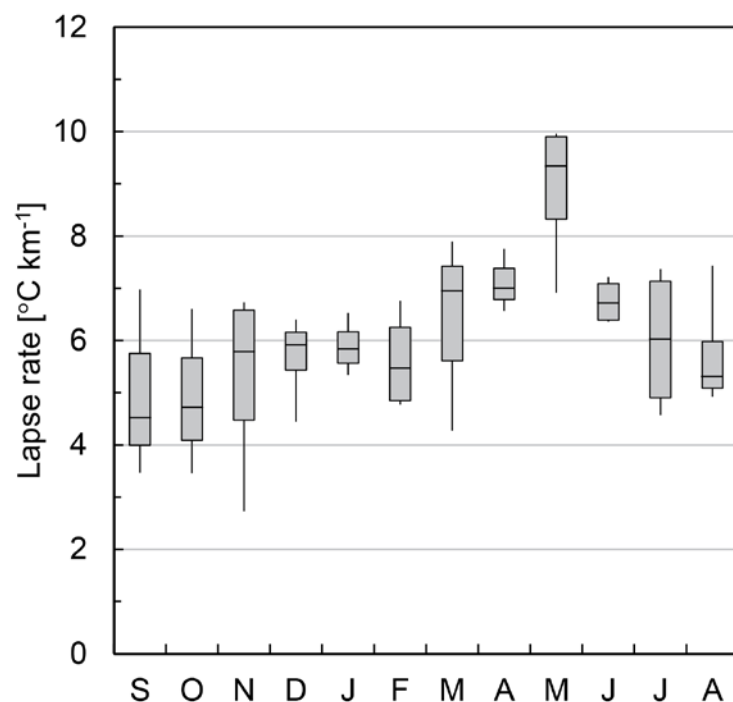

**Figure 9.** Inter-annual variability from 2009-2013 in monthly-mean lapse rates based on air temperature data from Rihpojavri (502 m a.s.l.) and Signaldalen (65 m a.s.l.) from 2009-2013. Boxes show the interquartile range of the month's lapse rate, horizontal lines inside the boxes show the median values, and the whiskers show the full range of the data.

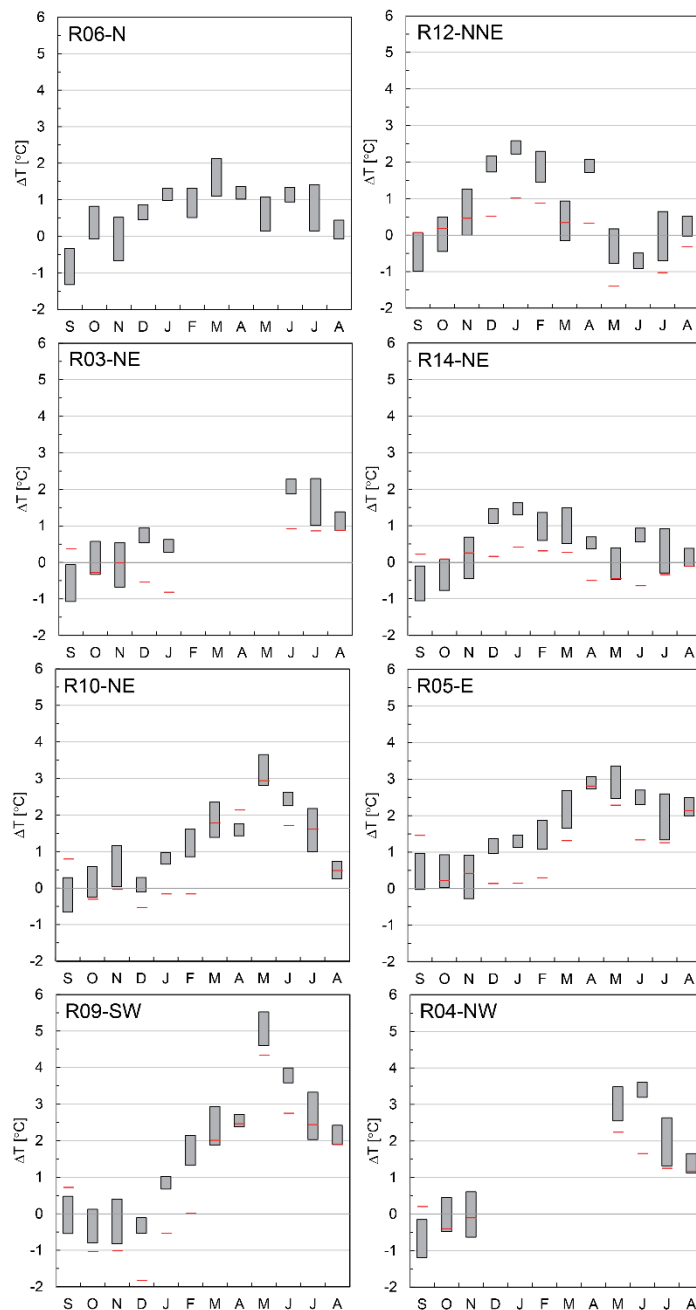

**Figure 10.** Monthly temperature difference ( $\Delta T$ ) between calculated air temperature and measured rock face temperatures from 2009-2013. Calculated air temperature is based on air temperature from Signaldalen (65 m a.s.l.) and lapse rates shown in Figure 9. Boxes show the interquartile range of  $\Delta T$ . The red horizontal lines show the monthly-mean temperature difference between the respective loggers and the north-facing (i.e., the coldest) logger R06. Loggers R03, R04 and R12 were snow covered during winter and data was removed for snow-influenced months. For R09 and R10 only data for 2009-2011 exist, for R12 and R14 only for 2011-2013.



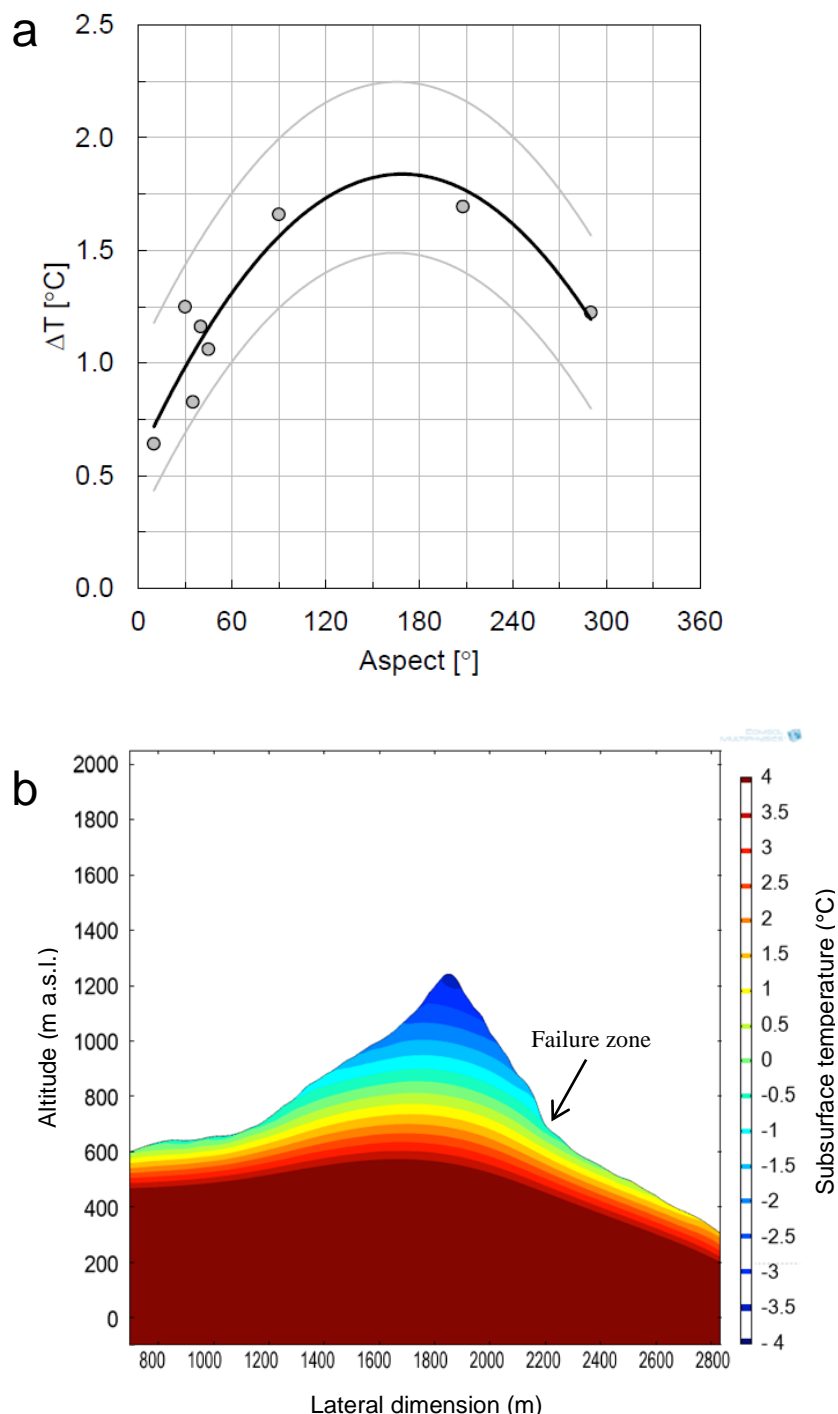

**Figure 11.** a) Annual temperature difference ( $\Delta T$ ) between calculated air temperature and measured rock face temperatures and aspect dependency as derived from the rock wall temperature data. The points represent the mean values and the black line is the best polynomial fit to the data ( $R^2=0.84$ ). The grey lines show the polynomial fit to the interquartile range of  $\Delta T$ . b) 3D transient heat modelling of the subsurface temperature field based on values identified in a). Figure shows a slice transecting the mountain from South (left) to North (right).

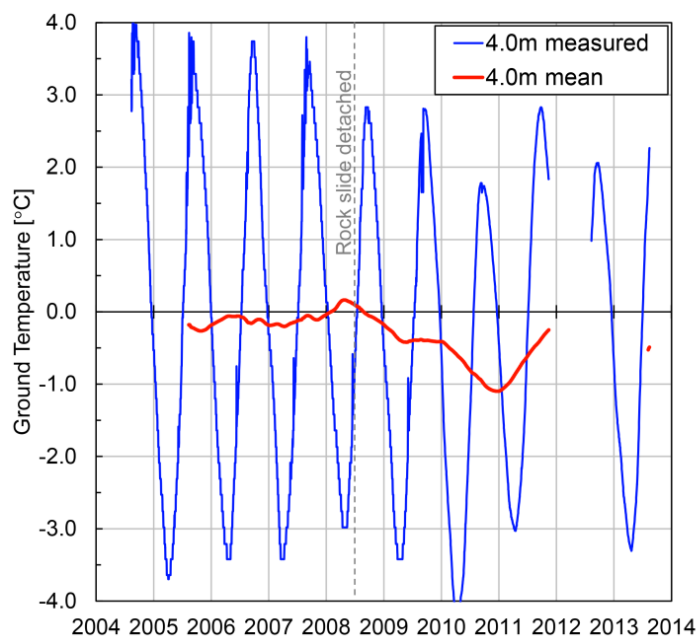

**Figure 12.** Ground temperature time-series at 4 m depth from a nearby permafrost borehole (Guolasjávri Gu-B-1, 786 m a.s.l.; more details can be found in Farbrøt et al., 2013). The blue line shows the measured daily values and the red line shows a simple moving 365-days average, i.e. the unweighted mean of the previous 365 days. The grey dotted line indicates the release date of the Signaldalen rockslide.
